# Supplementary material
Source: publisher figshare collection journal article supplement (https://gsajournals.figshare.com/articles/dataset/_/7423889)
Supplement: Supplementary file 1 [file 1]

## SUPPLEMENTARY DATA

**Supplementary Figure S1. Transcriptional enhancer regions used in *GMR27E09-GAL4* and *GMR94G06-GAL4* constructs. A, B.** Genomic maps of the regions that contain the fragments that control expression in (A) *GMR27E09-GAL4* and (B) *GMR94G06-GAL4*. Maps, coordinates, genes and transcripts are from the *Drosophila* Genome Browser ([www.flybase.org](http://www.flybase.org), version R5.57). Orange regions in transcripts represent coding regions, grey regions represent untranslated regions, and lines represent introns.

**Supplementary Table S1. GAL4 screen expression summary.** Summary of expression data for the *GAL4* drivers screened. Each *GAL4* line was crossed with *UAS-Sec61 $\beta$ ::tdTom*, *UAS-CD4::GFP* except those + for Dlg staining, which were crossed with *UAS-Sec61 $\beta$ ::tdTom*. In the Type column “Neuromodulatory” indicates possible Type II and/or Type III MNs.

**Supplementary Movie S1. VNC showing neuronal plasma membrane labeling by *GMR27E09-GAL4*.** Confocal 3D projection of plasma membrane marker (CD4::GFP) from the VNC of *UAS-CD4::GFP*, *UAS-tdTom::Sec61 $\beta$ /+* ; *GMR27E09-GAL4/+* larvae. Scale bar, 50  $\mu$ m.

**Supplementary Movie S2. VNC showing neuronal ER labeling by *GMR27E09-GAL4*.** Confocal 3D projection of ER marker (tdTom::Sec61 $\beta$ ) from the same VNC as shown in Supplementary movie S1. Scale bar, 50  $\mu$ m.

**Supplementary Movie S3. VNC showing neuronal plasma membrane labeling by *GMR94G06-GAL4*.** Confocal 3D projection of plasma membrane marker (CD4::GFP) from the VNC of *UAS-CD4::GFP*, *UAS-tdTom::Sec61 $\beta$ /+* ; *GMR94G06-GAL4/+* larvae. Scale bar, 50  $\mu$ m.

**Supplementary Movie S4. VNC showing neuronal ER labeling by *GMR94G06-GAL4*.** Confocal 3D projection of ER marker (tdTom::Sec61 $\beta$ ) from the same VNC as shown in Supplementary movie S3. Scale bar, 50  $\mu$ m.
