# Supplementary material
Source: publisher figshare collection journal article supplement (https://gsajournals.figshare.com/articles/dataset/_/7423889)
Supplement: Supplementary file 3 [file 1]

**Supplementary Table 1**

| Line     | MNs | Innervation pattern                         | Type                        | Dlg stained | Comments                                                                             |
|----------|-----|---------------------------------------------|-----------------------------|-------------|--------------------------------------------------------------------------------------|
| GMR24H01 | 2   | Ventral muscles                             | Neuromodulatory             | +           | Further data in Fig. 3                                                               |
| GMR26B02 | 2   | Ventral and lateral muscles                 | Type Is and III             |             | Further data in Fig. 2                                                               |
| GMR27E09 | 2   | Ventral, lateral and dorsal muscles         | Type I                      | +           | More details in the main paper                                                       |
| GMR29H05 | --- | ---                                         | ---                         |             | Homozygous embryonic lethal                                                          |
| GMR31C03 | 3   | Ventral, lateral and dorsal muscles         | Type II                     |             | Further data in Fig. 2                                                               |
| GMR35F03 | 3   | Ventral, lateral and dorsal muscles         | Type Ib and II              |             | Much higher expression levels in epidermal cells than in MNs. Further data in Fig. 2 |
| GMR43G02 | 2   | Muscles between ventral and lateral regions | Type III                    |             | Further data in Fig. 2                                                               |
| GMR45A05 | 1   | Muscles between ventral and lateral regions | Type III                    | +           | Further data in Fig. 3                                                               |
| GMR56G03 | 1   | Muscles between ventral and lateral regions | Type III                    | +           | Low expression levels in the MNs and high in epidermal cells. Further data in Fig. 3 |
| GMR64B05 | 2   | Several ventral and lateral muscles         | Type Ib and Neuromodulatory | +           | Further data in Fig. 3                                                               |
| GMR65H09 | 1   | Ventral, lateral and dorsal muscles         | Neuromodulatory             |             | MN included in the transversal nerve. Further data in Fig. 2                         |
| GMR69G08 | 3   | Ventral, lateral and dorsal muscles         | Type II                     |             | Further data in Fig. 2                                                               |
| GMR74A06 | 2   | Muscles between ventral and lateral regions | Type III                    |             | Further data in Fig. 2                                                               |
| GMR80C02 | 2   | Ventral and lateral muscles                 | Type II                     | +           | Further data in Fig. 3                                                               |
| GMR84D10 | 1   | Muscles between ventral and lateral regions | Type III                    |             | Low signal levels in axon. Further data in Fig. 2                                    |
| GMR85F10 | 3   | Several ventral, lateral and dorsal muscles | Type II                     |             | Further data in Fig. 2                                                               |
| GMR91E03 | 2   | Lateral muscles                             | Type II                     |             | Further data in Fig. 2                                                               |
| GMR92C02 | 2   | Ventral, lateral and dorsal muscles         | Neuromodulatory             |             | Further data in Fig. 2                                                               |
| GMR94G06 | 1   | A dorsal muscle                             | Type I                      | +           | More details in the main paper                                                       |
