# Supplementary material
Source: publisher figshare collection journal article supplement (https://gsajournals.figshare.com/articles/dataset/_/7423889)

Supplementary Figure S1

A

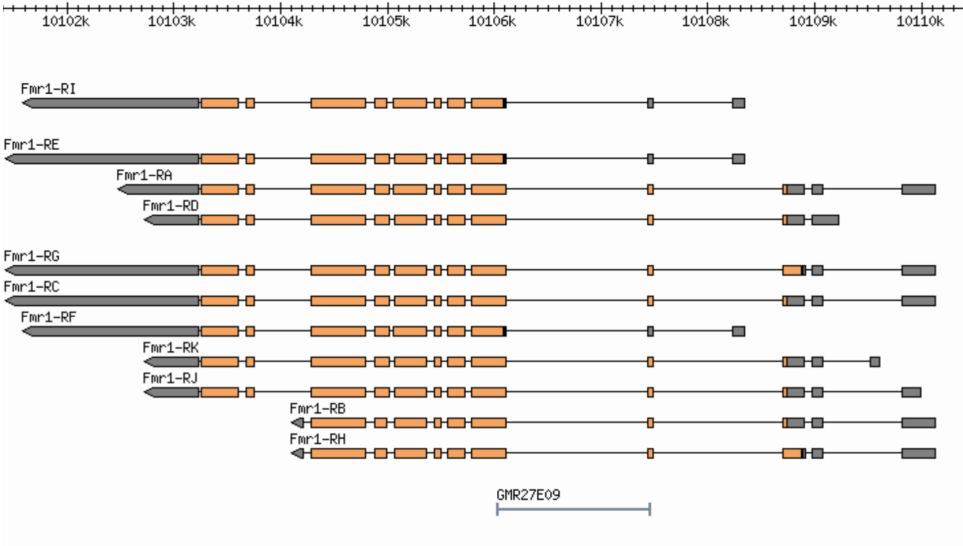

B

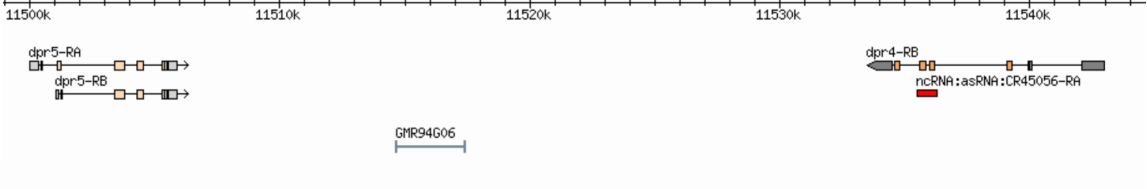

Supplement: Supplementary file 2 [file 1]
